# Supplementary material for: Oral Administration of Sargassum horneri Improves the HDM/DNCB-Induced Atopic Dermatitis in NC/Nga Mice
Source: MDPI journal article supplement (doi:10.3390/nu12082482), 2020-08-18
Supplement: s1 [file s1]

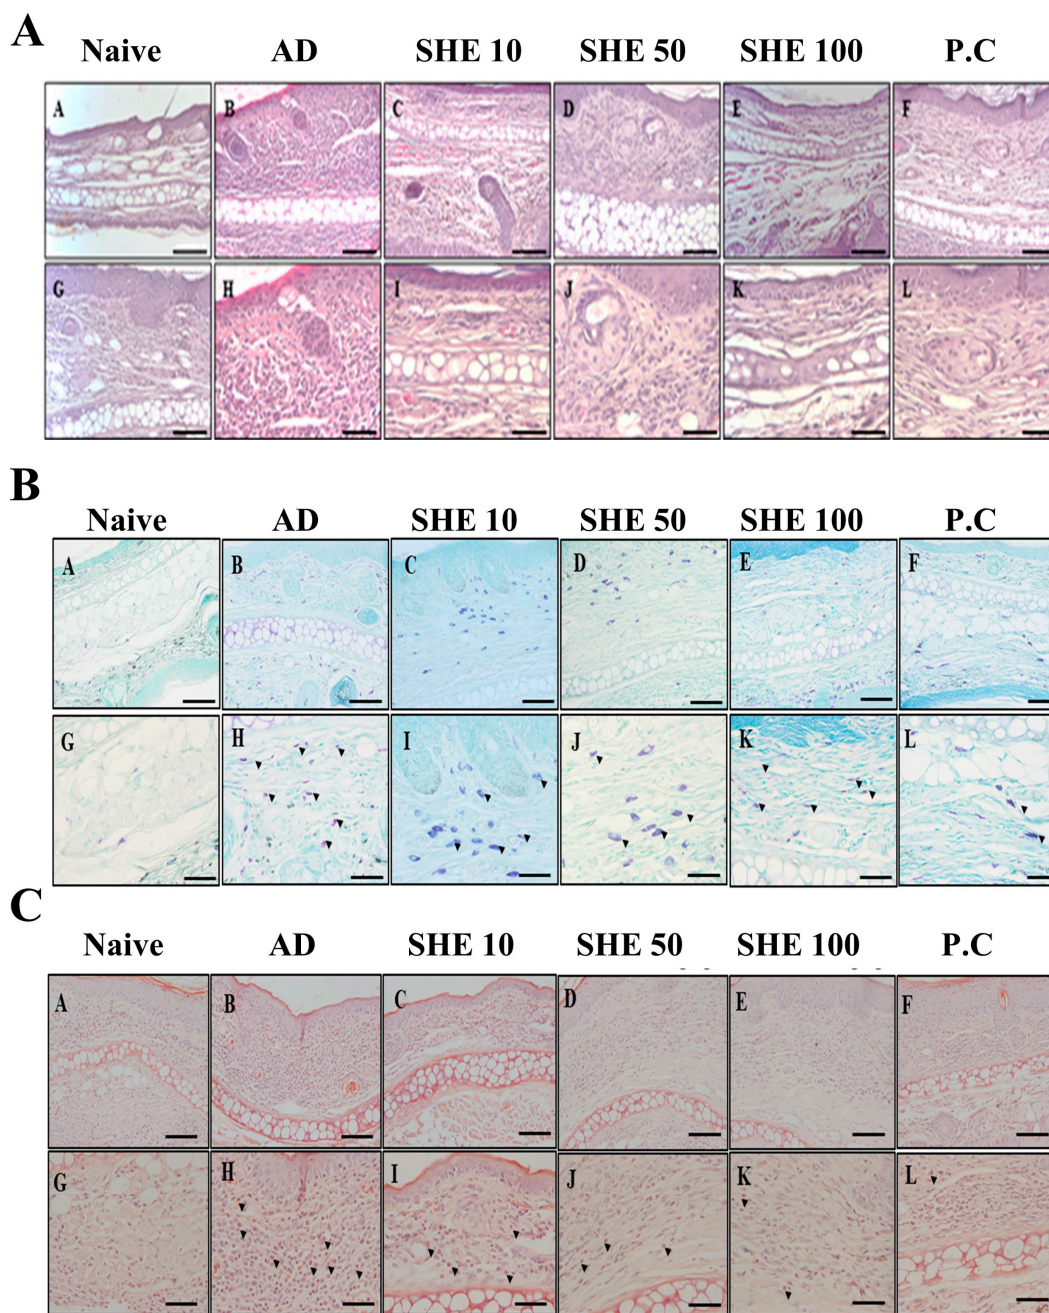

1  
2  
3  
4  
5  
6  
7

**Figure S1.** Comparison of the ear edema and histopathology of ear lesions in HDM/DNCB-induced AD mice. (A) Ear thickness, (B) comparison of the histopathology of ear lesions after repeated oral administration of SHE on hematoxylin and eosin-stained tissues, (C) toluidine-blue-stained skin, and (D) congo-red stained skin. Experiments were performed in triplicates and the data were expressed as mean  $\pm$  SE. Values with different alphabets were significantly different at  $p < 0.05$ , as analyzed by PASW statistics 21.0 software.
